# Supplementary material for: Microneedle-mediated gene delivery for the treatment of ischemic myocardial disease
Source: PubMed Central journal article supplement — Sci Adv. 2020 Jun 17;6(25):eaaz3621. doi: 10.1126/sciadv.aaz3621 (PMC7299628; doi:10.1126/sciadv.aaz3621), 2020-06-17
Supplement: aaz3621_SM.pdf [file aaz3621_SM.pdf]

## Supplementary Materials for

### **Microneedle-mediated gene delivery for the treatment of ischemic myocardial disease**

Hongpeng Shi, Tong Xue, Yang Yang, Chenyu Jiang, Shixing Huang, Qi Yang, Dong Lei, Zhengwei You, Tuo Jin, Fei Wu\*, Qiang Zhao\*, Xiaofeng Ye\*

\*Corresponding author. Email: [xiaofengye@hotmail.com](mailto:xiaofengye@hotmail.com) (X.Y.); [zq11607@rjh.com.cn](mailto:zq11607@rjh.com.cn) (Q.Z.); [feiwu@sjtu.edu.cn](mailto:feiwu@sjtu.edu.cn) (F.W.)

Published 17 June 2020, *Sci. Adv.* **6**, eaaz3621 (2020)  
DOI: 10.1126/sciadv.aaz3621

#### **The PDF file includes:**

Figs. S1 to S10  
Legends for movies S1 to S4  
Table S1

#### **Other Supplementary Material for this manuscript includes the following:**

(available at [advances.sciencemag.org/cgi/content/full/6/25/eaaz3621/DC1](https://advances.sciencemag.org/cgi/content/full/6/25/eaaz3621/DC1))

Movies S1 to S4

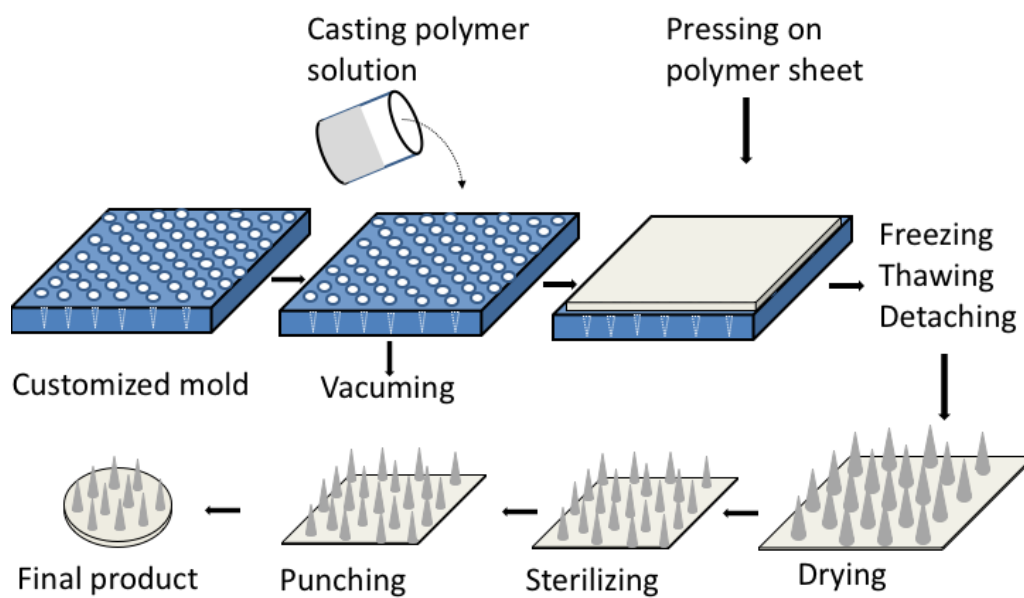

**Fig. S1.** Schematic of the experimental procedures performed to illustrate the fabrication process of the MNs.

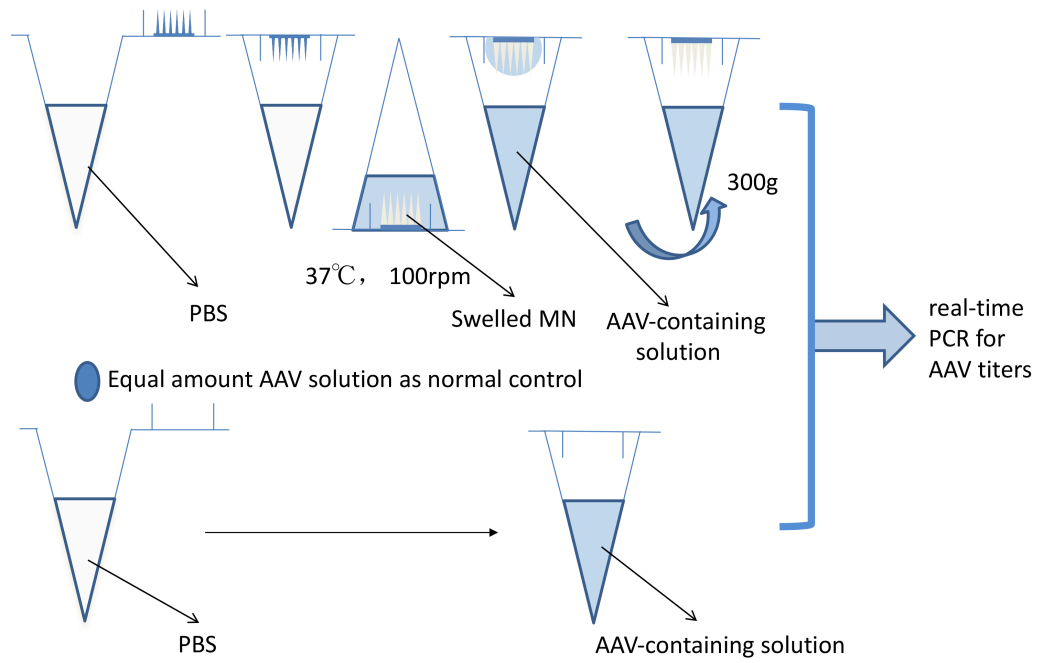

**Fig. S2.** Schematic of the experimental procedures performed to collect the released AAV fluid.

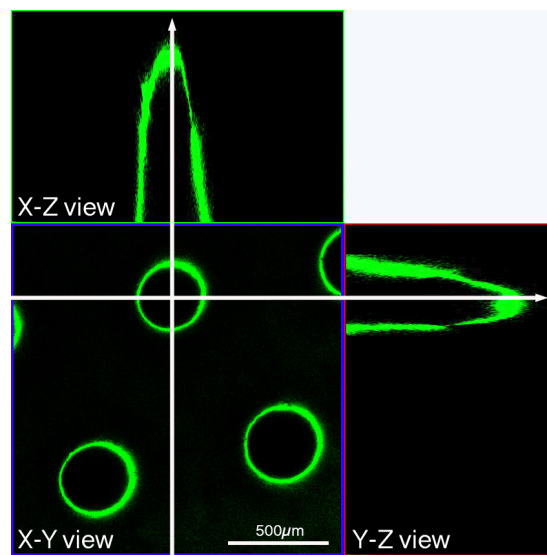

**Fig. S3.** The ortho view generated from a confocal laser scanning micrograph of z-stack images visualizes the MN tip as transverse section (x-y) and lateral sections (x-z, y-z) views.

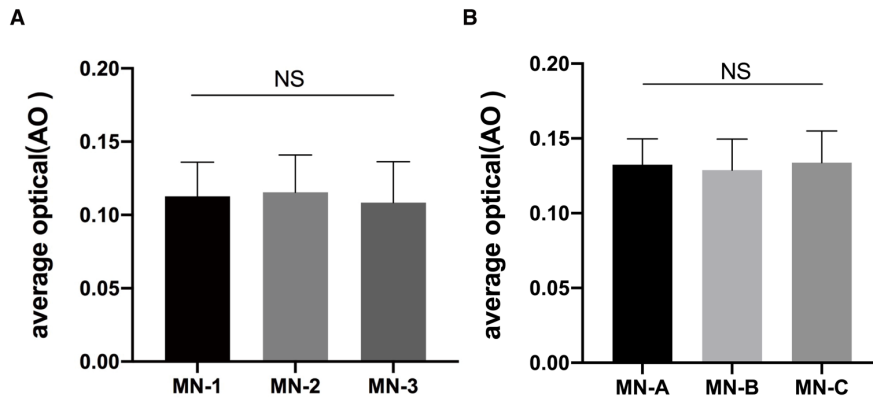

**Fig. S4. Uniformity of MN-AAV.** (A) Comparison of fluorescence intensity among three MN patches. (B) Comparison of fluorescence intensity among three rat hearts that received MN-FITC-AAV (15 puncture points were analyzed in each fluorescent image). NS, not significant.

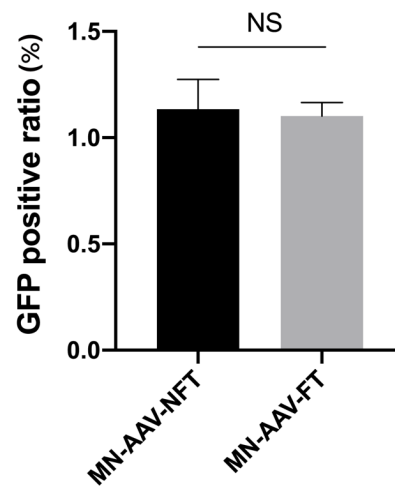

**Fig. S5. Tolerance of MN-AAV subjected or not subjected to the freeze-thaw process.** MN-AAV-NFT represents virus-containing MNs not subjected to the freeze-thaw process. MN-AAV-FT represents virus-containing MNs subjected to the freeze-thaw process. n=5 patches in each group. NS, not significant.

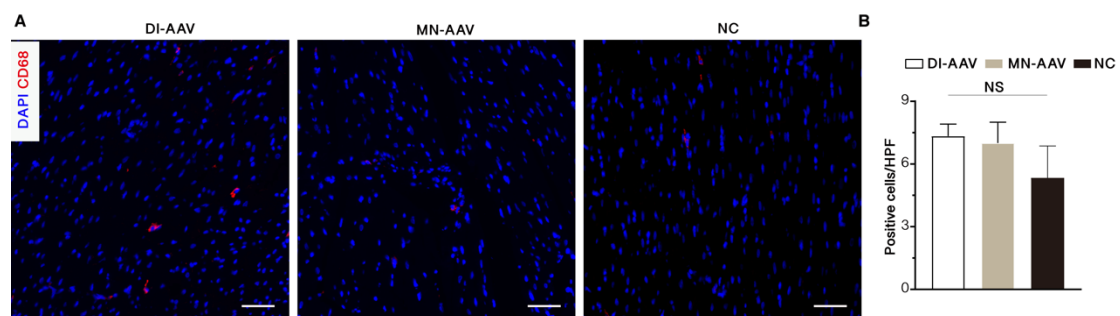

**Fig. S6. Inflammatory response in the MN-AAV group compared with the DI-AAV and NC groups.** Histogram showing the numbers of positive cells in the three groups. n = 3 hearts for each group. Scale bar: 50  $\mu$ m. NS, not significant.

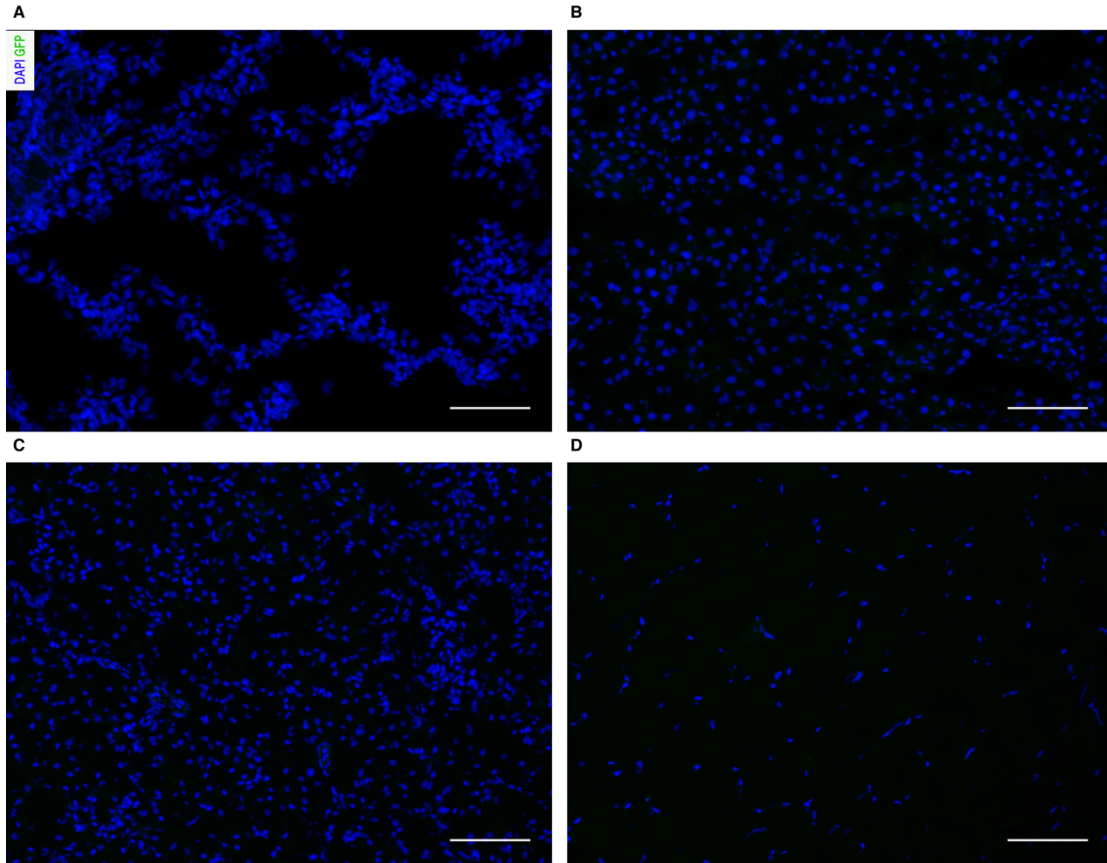

**Fig. S7. Determination of vector dissemination to off-target organs.** (A) Lungs. (B) Liver. (C) Kidneys. (D) Skeletal muscles. Lung, liver, kidney and skeletal muscle tissues were harvested 4 weeks following MN-AAV-GFP application. No GFP expression was found in the above organs and tissues.  $n = 3$  rats for each organ. Scale bar: 100  $\mu\text{m}$ .

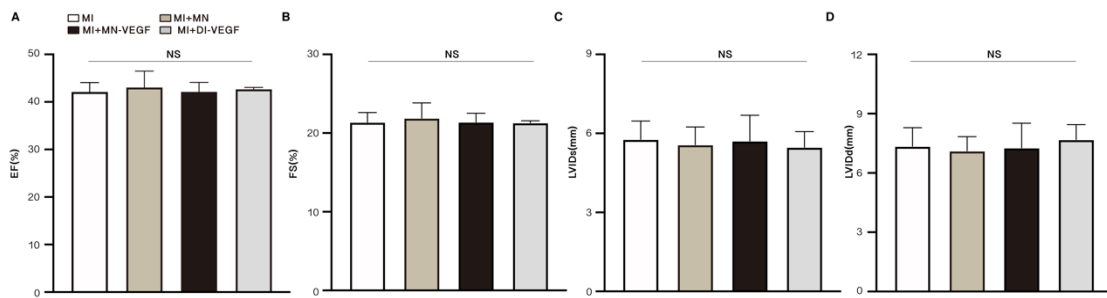

**Fig. S8. Heart performance parameters measured at baseline did not significantly differ among the four groups.** (A) EF. (B) FS. (C) LVIDs. (D) LVIDd. NS, not significant.

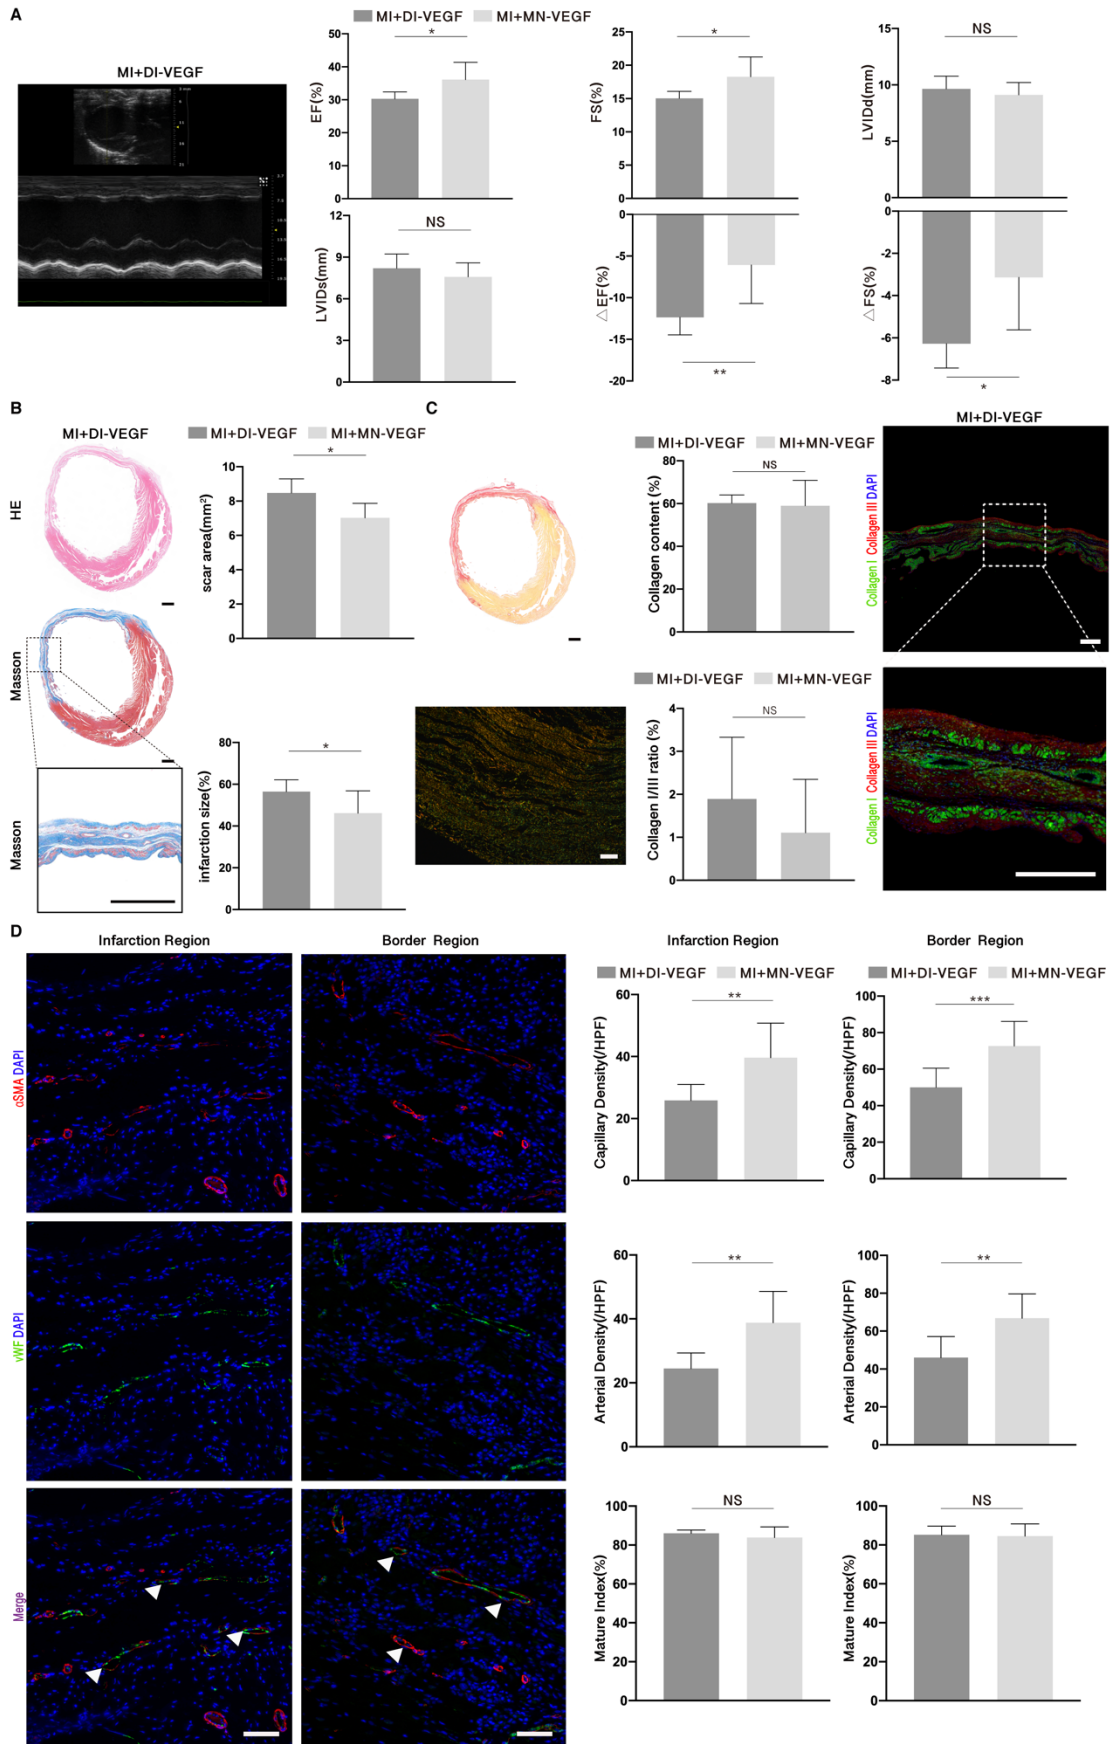

**Fig. S9. Parameters of the MI+DI-VEGF group.** (A) Representative echocardiographic images and heart performance of the MI+DI-VEGF group compared with the MI+MN-VEGF group (EF, FS, LVIDs, LVIDd,

$\Delta EF$  and  $\Delta FS$ ). (B) Representative Masson's trichrome-stained myocardial sections and quantitative analyses of the scar areas and infarct sizes compared with those in the MI+MN-VEGF group. Scale bar: 1 mm. (C) Identification of collagens via picrosirius red staining (Scale bar: 1 mm), polarized light microscopy (Scale bar: 100  $\mu m$ ) and fluorescence staining (type I collagen was stained green, and type III collagen was stained red; Scale bar: 500  $\mu m$ ). The histograms show comparisons of the collagen content and the type I/type III collagen ratios between the MI+DI-VEGF and MI+MN-VEGF groups. (D) Representative immunofluorescent images of vWF (green) and  $\alpha SMA$  (red) in the tissues of the infarction and border regions ( $n = 3$  animals per group; Scale bar: 50  $\mu m$ ). The histograms show the values and comparisons of capillary density, arterial density and the mature index between the MI+DI-VEGF and MI+MN-VEGF groups. \* $p < 0.05$ , \*\* $p < 0.01$  and \*\*\* $p < 0.001$ . NS, not significant.

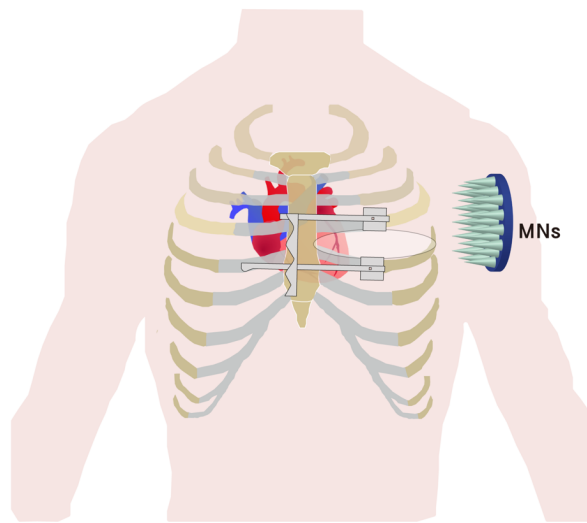

**Fig. S10. Schematic diagram of our vision for translation of the MNs into the clinic.** The patient is receiving MNs via a small thoracic incision.

**Movie S1. Application of a customized MN apparatus without MN loading.**

**Movie S2. Rat heart following MN application.**

**Movie S3. Application of methylene blue-loaded MNs via a customized adapter.**

**Movie S4. Rat heart following the application of methylene blue-loaded MNs.**

**Table S1. Antibodies used in the current study.**

| Antibody                          | Source; Cat. No.        | Application     | Notes        |
|-----------------------------------|-------------------------|-----------------|--------------|
| Anti-human VEGF165                | R&D; AF-293-NA          | WB <sup>a</sup> | Primary Ab   |
| Anti-VEGF receptor 2              | CST; #12634             | WB              | Primary Ab   |
| Anti-PI3 kinase                   | CST; #4249              | WB              | Primary Ab   |
| Anti-Akt                          | CST; #4691              | WB              | Primary Ab   |
| Anti-p-Akt                        | CST; #13038             | WB              | Primary Ab   |
| Anti-Caspase9                     | Abcam; ab2013           | WB              | Primary Ab   |
| Anti-GAPDH                        | Proteintech; 60004-1-Ig | WB              | Primary Ab   |
| Anti-luciferase                   | Abcam; ab181640         | WB              | Primary Ab   |
| Anti-von Willebrand factor        | Abcam; ab6994           | IF <sup>b</sup> | Primary Ab   |
| Anti- $\alpha$ SMA                | Abcam; ab5694           | IF              | Primary Ab   |
| Anti-Collagen I                   | Abcam; ab34710          | IF              | Primary Ab   |
| Anti-Collagen III                 | Abcam; ab7778           | IF              | Primary Ab   |
| Anti-CD68                         | Abcam; ab125212         | IF              | Primary Ab   |
| Anti-Anti-cTnT                    | Abcam; ab8295           | IF              | Primary Ab   |
| Goat anti-rabbit Alexa Fluor® 488 | Invitrogen; A-11008     | IF              | Secondary Ab |
| Goat anti-mouse Alexa Fluor® 594  | Invitrogen; A-11032     | IF              | Secondary Ab |
| Goat anti-rabbit Alexa Fluor® 594 | Invitrogen; A-11012     | IF              | Secondary Ab |

a, Western blot; b, immunofluorescence
